# Supplementary material for: Potato Protein Fining of Phenolic Compounds in Red Wine: A Study of the Kinetics and the Impact of Wine Matrix Components and Physical Factors
Source: MDPI journal article supplement (doi:10.3390/molecules24244578), 2019-12-13
Supplement: s1 [file s1]

# Supplementary Materials:

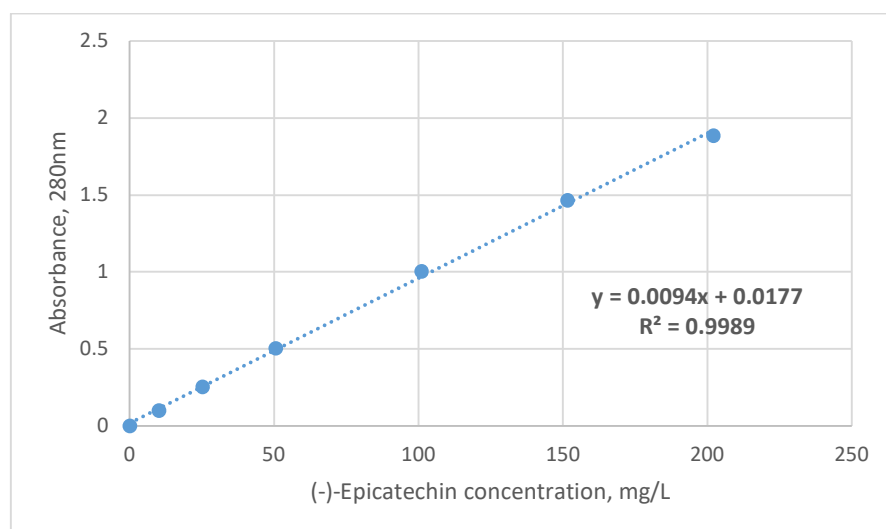

**Figure S1.** The standard curve of tannin concentration (epicatechin eq.) of methyl cellulose precipitable method.
